# Supplementary material for: Avian haemosporidian parasites of accipitriform raptors
Source: PubMed Central journal article supplement (PMC8729155; doi:10.1186/s12936-021-04019-z), 2022-01-05
Supplement: 12936_2021_4019_MOESM1_ESM.pdf [file 12936_2021_4019_MOESM1_ESM.pdf]

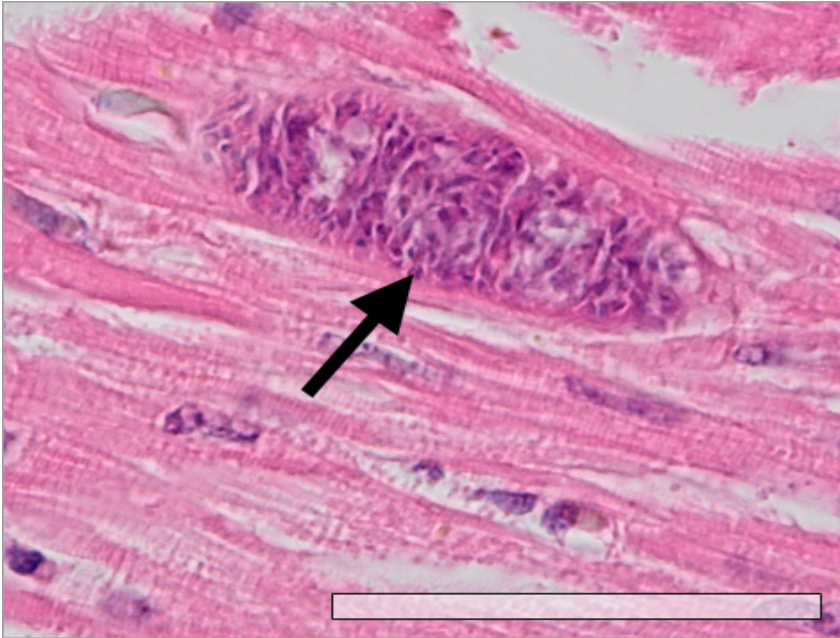

**Additional file 1: Figure S1.** An intramuscular parasite cyst (arrow) detected in a hematoxylin-eosin stained section of the heart of a western marsh harrier *Circus aeruginosus* co-infected with *Leucocytozoon* sp. ICIAE03 and *P. circumflexum* pTURDUS1. The morphology resembles tissue cysts of parasites belonging to the family Sarcocystidae (Conoidasida, Apicomplexa). Scale bar is 50µm.
